# Supplementary material for: Medicare Accountable Care Organizations and Antidepressant Use by Patients With Depression
Source: Atypon-hosted journal article supplement (doi:10.1176/appi.ps.201600538), 2017-07-17
Supplement: appi.ps.201600538.ds001.pdf [file appi.ps.201600538.ds001.pdf]

**Appendix Table 1: Characteristics of study sample with depression: comparison of ACOs vs. control group**

| Beneficiary characteristics                   | Unadjusted pre-contract mean | Differences between ACOs and control group in pre-contract period <sup>a</sup> |                                                       |                                                       | Differential change from pre-contract period to post-contract period, ACOs vs. control group |                           |                            |                            |
|-----------------------------------------------|------------------------------|--------------------------------------------------------------------------------|-------------------------------------------------------|-------------------------------------------------------|----------------------------------------------------------------------------------------------|---------------------------|----------------------------|----------------------------|
|                                               |                              | Pioneer<br>N=19,502<br>person-years                                            | MSSP 2012<br>entry cohort<br>N=38,062<br>person-years | MSSP 2013<br>entry cohort<br>N=43,008<br>person-years | Pioneer                                                                                      |                           | MSSP 2012<br>entry cohort  | MSSP 2013<br>entry cohort  |
|                                               |                              |                                                                                |                                                       |                                                       | Post Year 2012<br>N=7,577                                                                    | Post Year 2013<br>N=7,963 | Post Year 2013<br>N=16,112 | Post Year 2013<br>N=14,246 |
| Mean age, years                               | 62.1                         | .2                                                                             | 1.1                                                   | .6                                                    | .4                                                                                           | .3                        | .1                         | .04                        |
| Female sex, %                                 | 70.7                         | 2.3***                                                                         | 2.0***                                                | 1.5***                                                | -.8                                                                                          | -.6                       | -1.3**                     | -.7                        |
| Race/Ethnicity, %                             |                              |                                                                                |                                                       |                                                       |                                                                                              |                           |                            |                            |
| Non-Hispanic white                            | 79.0                         | 1.6                                                                            | -1.1                                                  | .9                                                    | -.1                                                                                          | -.5                       | .1                         | .2                         |
| Non-Hispanic black                            | 9.6                          | -.03                                                                           | .4                                                    | -.5                                                   | .2                                                                                           | .2                        | -.2                        | -.3                        |
| Hispanic                                      | 8.5                          | -.4                                                                            | .4                                                    | -.6                                                   | -.7*                                                                                         | -.2                       | .1                         | .1                         |
| Other                                         | 2.9                          | -1.2*                                                                          | .2                                                    | .2                                                    | .6*                                                                                          | .5                        | 0                          | .02                        |
| Medicaid recipient, %                         | 51.1                         | -3.0*                                                                          | .8                                                    | -3.8***                                               | .7                                                                                           | 0                         | -.2                        | -.5                        |
| Disabled, % <sup>b</sup>                      | 59.4                         | -1.0                                                                           | -2.6*                                                 | -2.0*                                                 | -.5                                                                                          | -1.5*                     | -.1                        | -.3                        |
| End-stage renal disease, %                    | 1.4                          | .2*                                                                            | .1                                                    | -.1*                                                  | -.1                                                                                          | -.2                       | .1                         | .1                         |
| Nursing home resident, %                      | 6.3                          | -.5                                                                            | 3.3                                                   | -1.5***                                               | -0                                                                                           | -.5                       | -.3                        | -.2                        |
| ZCTA-level <sup>c</sup> characteristics, mean |                              |                                                                                |                                                       |                                                       |                                                                                              |                           |                            |                            |
| Below FPL, %                                  | 10.4                         | -.5                                                                            | -.4*                                                  | -.6**                                                 | .1                                                                                           | -.05                      | .05                        | .1                         |
| High school degree, %                         | 73.3                         | 2.1**                                                                          | .7                                                    | 1.4**                                                 | -.1                                                                                          | .2                        | -.1                        | -.1                        |
| College degree, %                             | 18.3                         | 2.3**                                                                          | .6                                                    | 1.3**                                                 | -.1                                                                                          | .1                        | -.1                        | -.1                        |
| CCW conditions <sup>d</sup>                   |                              |                                                                                |                                                       |                                                       |                                                                                              |                           |                            |                            |
| Total number, mean                            | 6.1                          | 0                                                                              | .1                                                    | -.1                                                   | 0                                                                                            | 0                         | .1*                        | 0                          |
| ≥6 conditions, %                              | 53.0                         | 1.0                                                                            | 1.4                                                   | -.5                                                   | -.2                                                                                          | -.7                       | .6                         | 0                          |
| ≥9 conditions, %                              | 25.2                         | 0                                                                              | 1.4                                                   | -.7                                                   | .7                                                                                           | .1                        | .4                         | -.1                        |
| HCC <sup>e</sup> risk                         | 1.7                          | 0                                                                              | 0                                                     | 0                                                     | 0                                                                                            | 0                         | 0                          | -.01                       |

|             |         |          |            |  |  |  |  |  |
|-------------|---------|----------|------------|--|--|--|--|--|
| score, mean |         |          |            |  |  |  |  |  |
|             | * p<.05 | ** p<.01 | *** p<.001 |  |  |  |  |  |

<sup>a</sup> The pre-contract period took place between 2009-2011 for the Pioneer and 2012 MSSP ACOs and between 2009-2012 for the 2013 MSSP ACOs.

<sup>b</sup> Indicates that disability was the original reason for Medicare eligibility.

<sup>c</sup> Zip code tabulation area from the U.S. census data.

<sup>d</sup> Conditions assessed from the Chronic Condition Data Warehouse (CCW), including: acute myocardial infarction, Alzheimer's disease, Alzheimer's disease and related disorders or senile dementia, anemia, asthma, atrial fibrillation, benign prostatic hyperplasia, chronic kidney disease, chronic obstructive pulmonary disease, diabetes, heart failure, hip/pelvic fracture, hyperlipidemia, hypertension, hypothyroidism, ischemic heart disease, osteoporosis, rheumatoid arthritis/osteoarthritis, stroke/transient ischemic attack, breast cancer, colorectal cancer, endometrial cancer, lung cancer, prostate cancer, glaucoma, and cataracts.

<sup>e</sup> Hierarchical Condition Category (HCC) score, which predicts annual spending based on diagnoses present in the prior year of claims and is used by Medicare for risk adjustment.
